# Supplementary material for: Development of a Genoserotyping Method for Salmonella Infantis Detection on the Basis of Pangenome Analysis
Source: MDPI journal article supplement (doi:10.3390/microorganisms9010067), 2020-12-29
Supplement: s1 [file s1]

## Supplementary Information

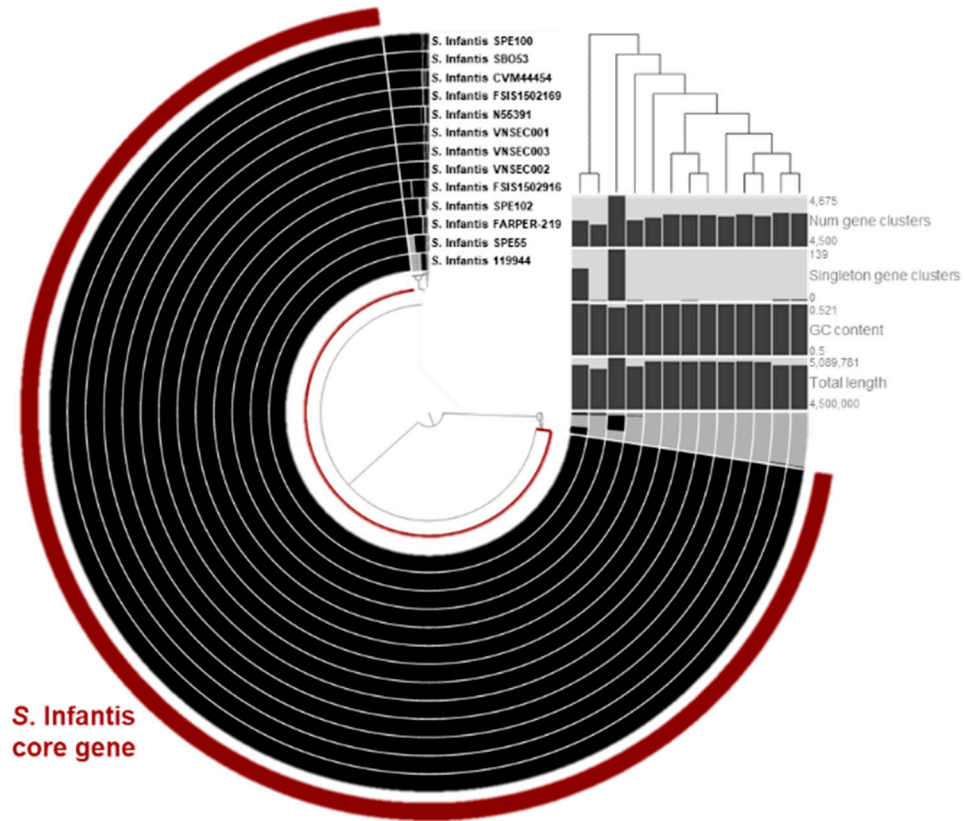

**Figure S1.** Pan-genome distribution of 13 *S. Infantis* genomes. Black rings represent *S. Infantis* genomes, and a red arc represents the core gene region conserved among *S. Infantis* genomes.
